# Supplementary material for: Heterobimetallic Ta–Nb MOF offering moderate Lewis/Brønsted acidity expedites glucose isomerization to fructose under microwave conditions
Source: Royal Society of Chemistry journal article supplement (doi:10.1039/d4se01331j), 2024-01-01
Supplement: d4se01331j1.pdf [file d4se01331j1.pdf]

## Supporting Information

### **Heterobimetallic Ta-Nb MOF offering a moderated Lewis/Brønsted acidity expedites glucose isomerization to fructose under microwave conditions**

Sangeeta Mahala,<sup>1</sup> Bhawana Devi,<sup>1</sup> Meera Cheviri,<sup>1</sup> Senthil Murugan Arumugam,<sup>1</sup>  
Balamurugan Arumugam,<sup>2</sup> Lakshmanan Potturaja,<sup>1</sup> Vishnu Bakthavachalam,<sup>1</sup> Joy K. Roy,<sup>3</sup>  
and Sasikumar Elumalai<sup>1,\*</sup>

<sup>1</sup> *Chemical Engineering Division, DBT-Center of Innovative and Applied Bioprocessing, Mohali, Punjab 140306 India*

<sup>2</sup> *Department of Chemistry, Sri Manakula Vinayagar Engineering College, Madagadipet, Puducherry 605107 India*

<sup>3</sup> *Agricultural Biotechnology Division, DBT-National Agri-Food Biotechnology Institute, Mohali, Punjab 140306 India*

\*Corresponding author information: [sasikumar@ciab.res.in](mailto:sasikumar@ciab.res.in) (S. Elumalai)

Tel: +91-172-5221-444

Total pages: 13

Total Tables: 1

Total Figures: 12

## Experimental

### Mathematical expressions

$$\begin{aligned} & \text{Glucose/Fructose conversion (\%)} \\ & = \frac{(\text{Initial wt. of sugar} - \text{Remaining wt. of sugar after completion})}{\text{Initial wt. of sugar}} \\ & \times 100 \end{aligned}$$

----- (S1)

$$\text{Product yield (\%)} = \frac{\text{Product weight}}{\text{Initial glucose weight}} \times 100$$

----- (S2)

$$\text{Product selectivity (\%)} = \frac{\text{Product weight}}{\text{Converted glucose in weight}} \times 100$$

----- (S3)

### First-order kinetic rate equation

$$\ln \left\{ \frac{[\text{Sugar}]_t}{[\text{Sugar}]_0} \right\} = -k \times \text{time (sec)}$$

----- (S4)

Where, sugar can be glucose or fructose.  $[\text{Sugar}]_t$  and  $[\text{Sugar}]_0$  represent the final and initial reactant (sugar) concentration at time  $t$ .  $k$  is the observed rate constant of reaction (disappearance of sugar).

The temperature dependency of the rate constant,  $k$  was determined by using the Arrhenius equation (Eqn. S5):

$$k = A_0 \times e^{\left( \frac{-E_a}{RT} \right)}$$

----- (S5)

where,  $A_0$  is the frequency factor (or Arrhenius constant),  $E_a$  is the activation energy (J/mol), and  $R$  is the universal gas constant (8.31 J/mol. K).

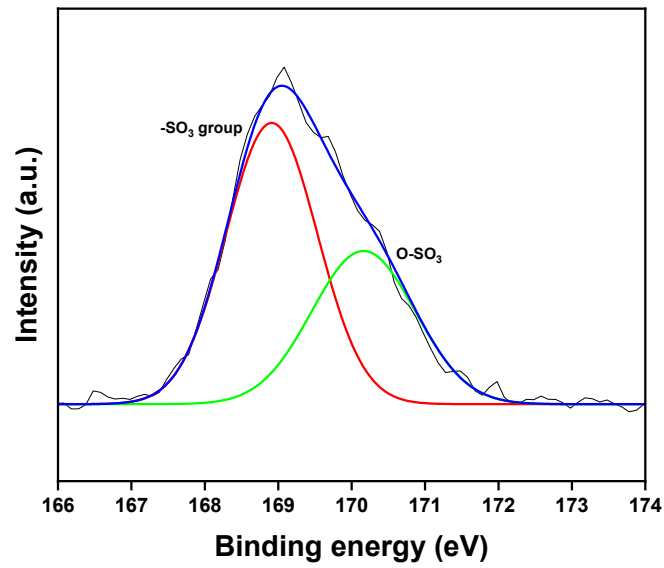

**Figure S1.** Deconvolution result of S 2p spectra of S-Ta MOF catalyst.

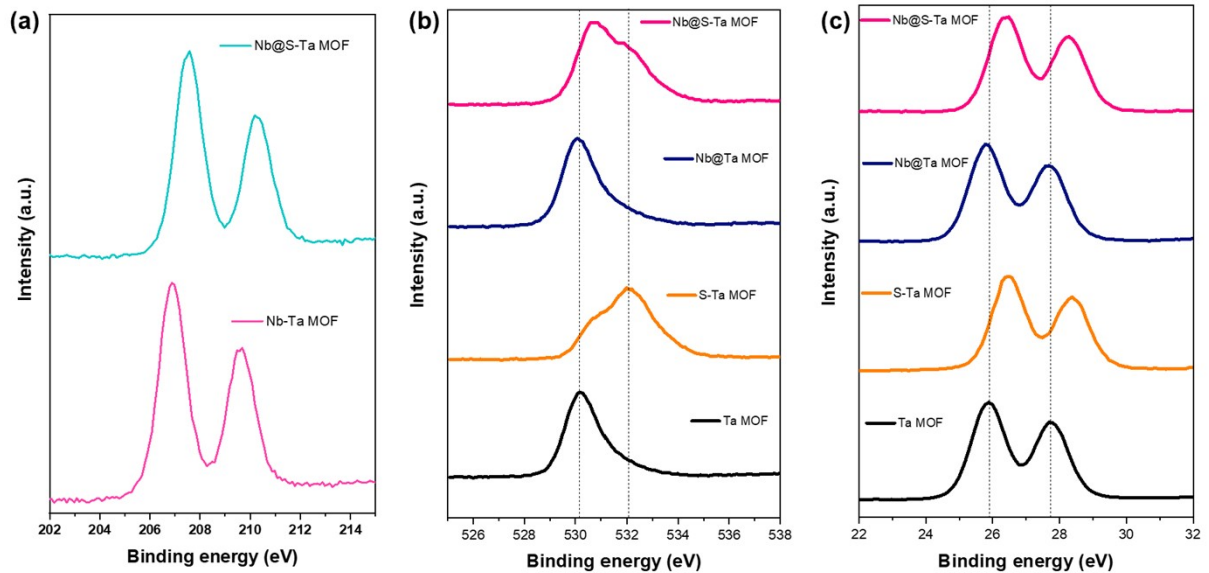

**Figure S2. Comparative XPS result** (a) Nb 3d spectra of Nb-Ta MOF and Nb@S-Ta MOF (b) O 1s spectra of Ta MOF, S-Ta MOF, Nb@Ta MOF and Nb@S-Ta MOF (c) Ta 4f spectra of Ta MOF, S-Ta MOF, Nb@Ta MOF and Nb@S-Ta MOF catalyst.

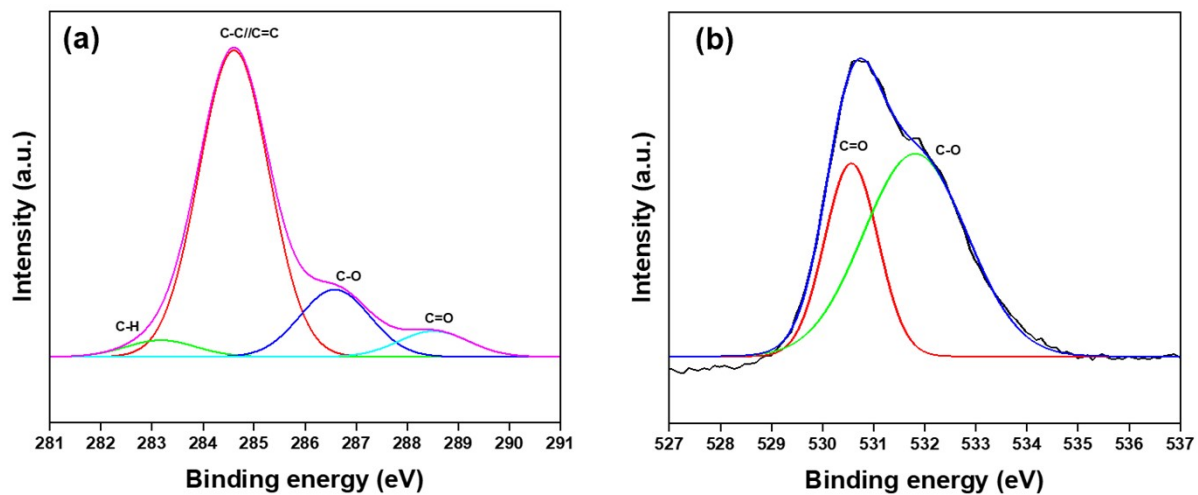

**Figure S3.** XPS deconvolution result of (a) C 1s and (b) O 1s spectra of Nb@S-Ta MOF catalyst.

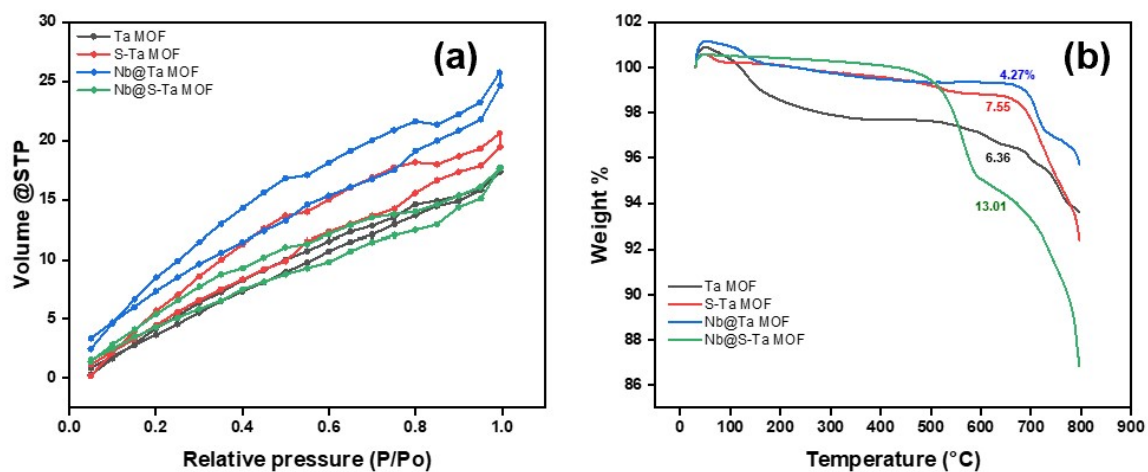

**Figure S4.** (a) N<sub>2</sub> adsorption/desorption isotherm and (b) TGA report of MOF catalysts.

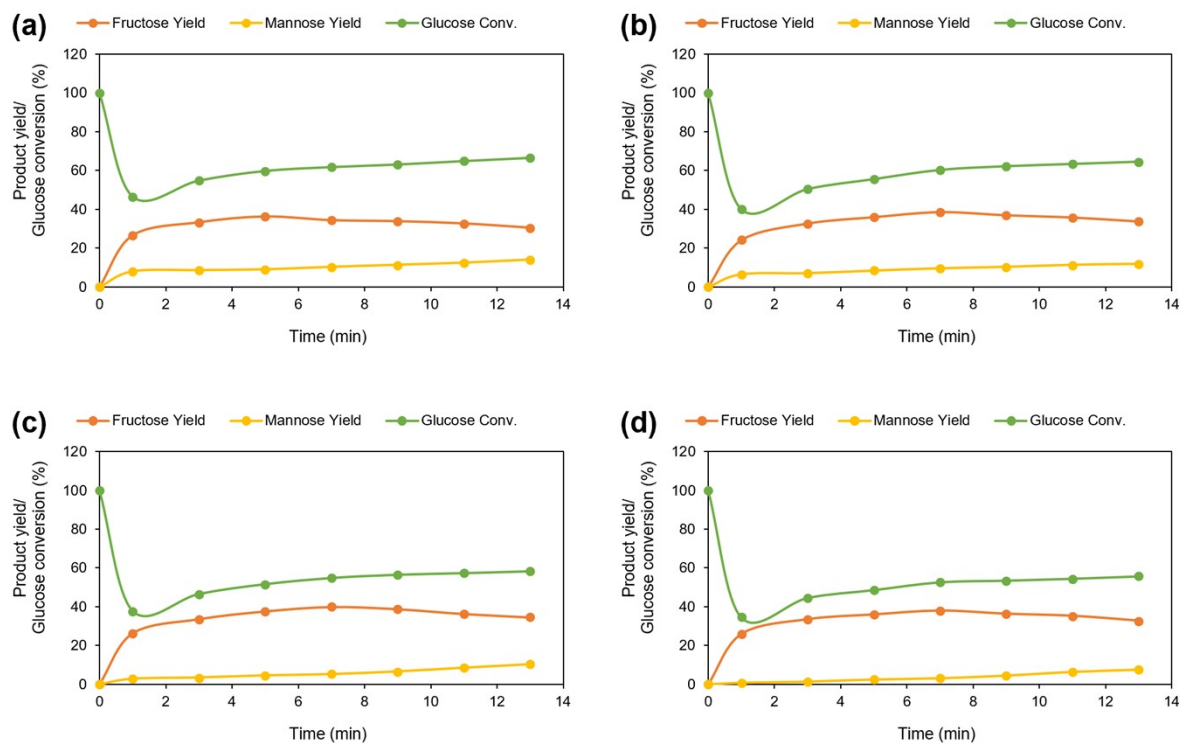

**Figure S5.** Glucose consumption and product(s) formation profile (fructose and mannose) with respect to change in Nb@S-Ta MOF loading on glucose under microwave conditions in a water medium: (a) 25%, (b) 50%, (c) 75% and (d) 100% at 100 °C up to 13 min.

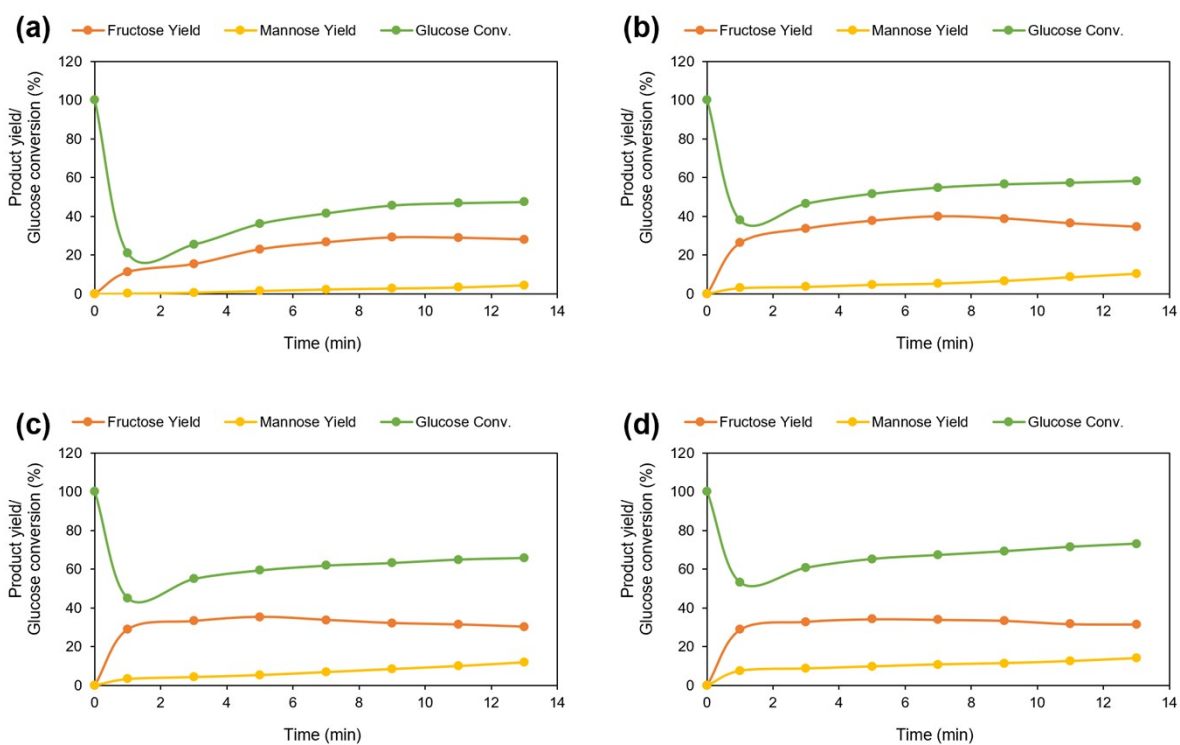

**Figure S6.** Glucose consumption and product(s) formation profile (fructose and mannose) with respect to change in temperature over Nb@S-Ta MOF under microwave conditions in a water medium: (a) 90 °C, (b) 100 °C, (c) 110 °C and (d) 120 °C at 50% catalyst load on glucose up to 13 min.

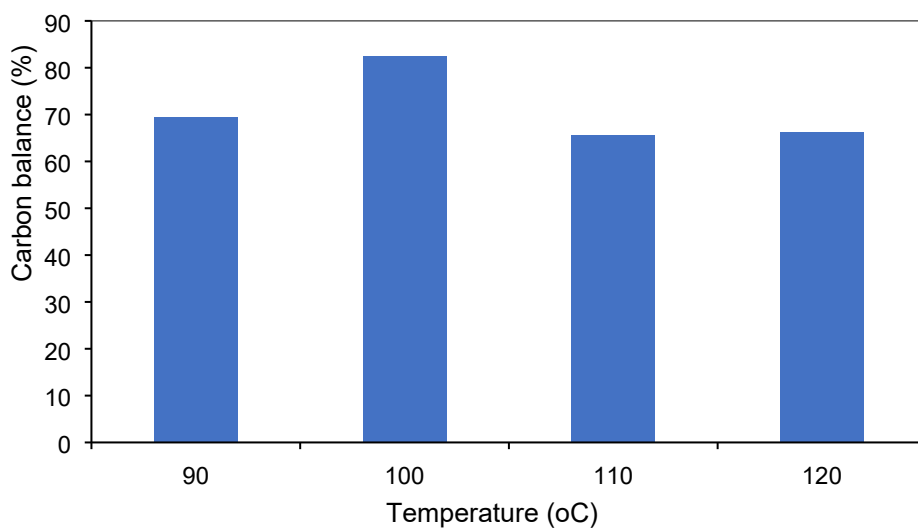

**Figure S7.** Carbon balance (CB) data of the effect of temperature (90-120 °C) on glucose isomerization to fructose over Nb@S-Ta MOF under microwave conditions in a water medium. Note: CB was made by relating the moles of carbon produced to the moles of carbon in the reactant.

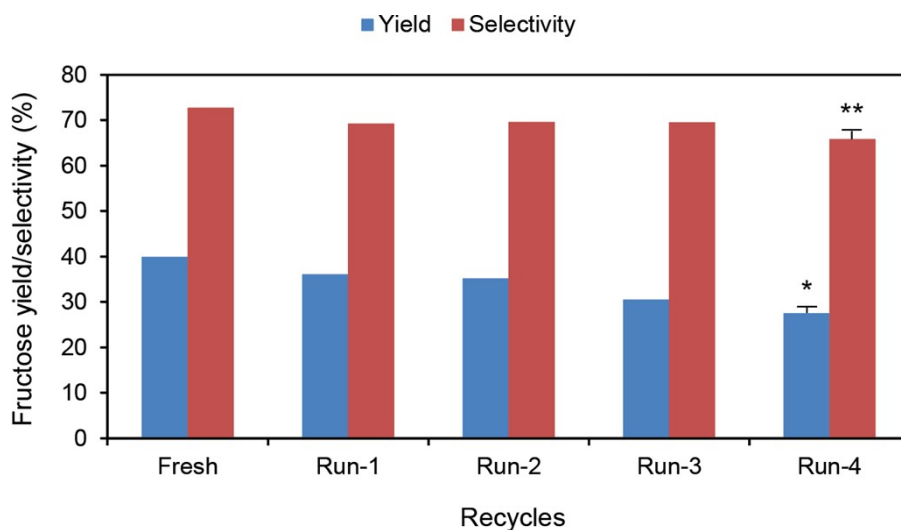

**Figure S8.** Result of recyclability of Nb@S-Ta MOF for glucose conversion to fructose under microwave conditions in a water medium at 100 °C at 50% catalyst load on glucose.

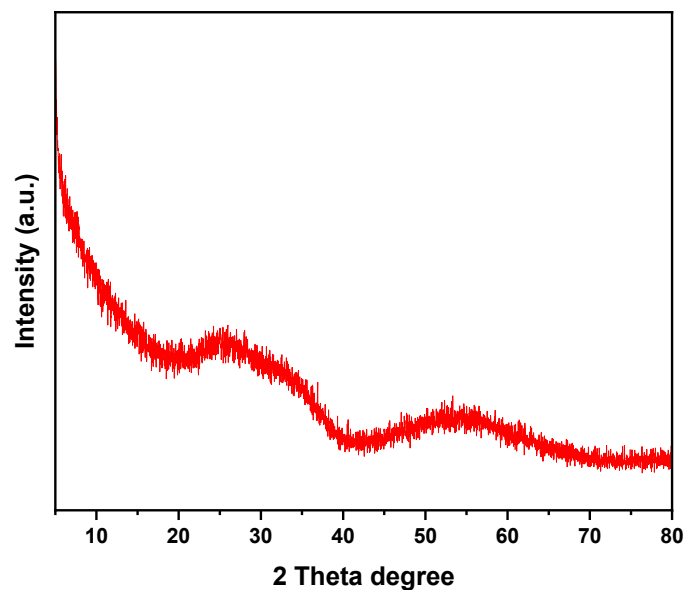

**Figure S9.** XRD result recycled Nb@S-Ta MOF after 5 runs (including a fresh run) of glucose conversion to fructose under microwave conditions in a water medium at 100 °C at 50% catalyst load on glucose.

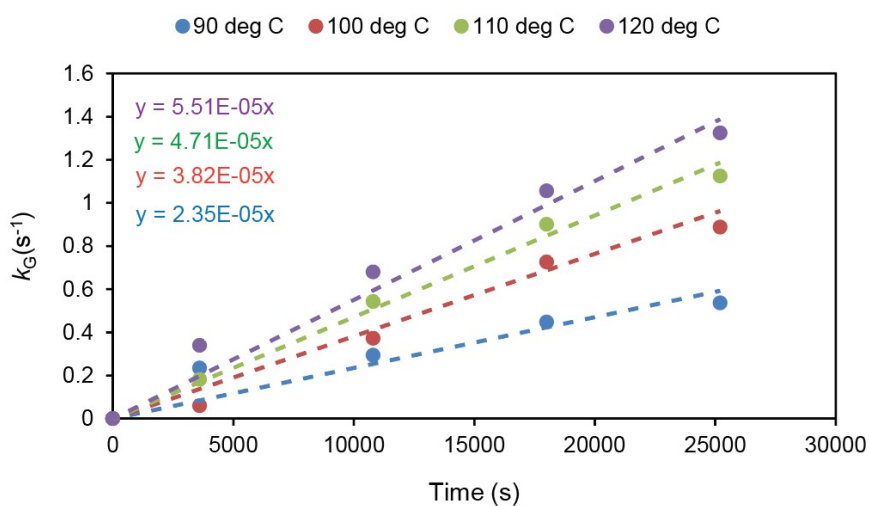

**Figure S10.** First-order model fitting of rate constant ( $k_G$ ) at different temperatures (90-120 °C).



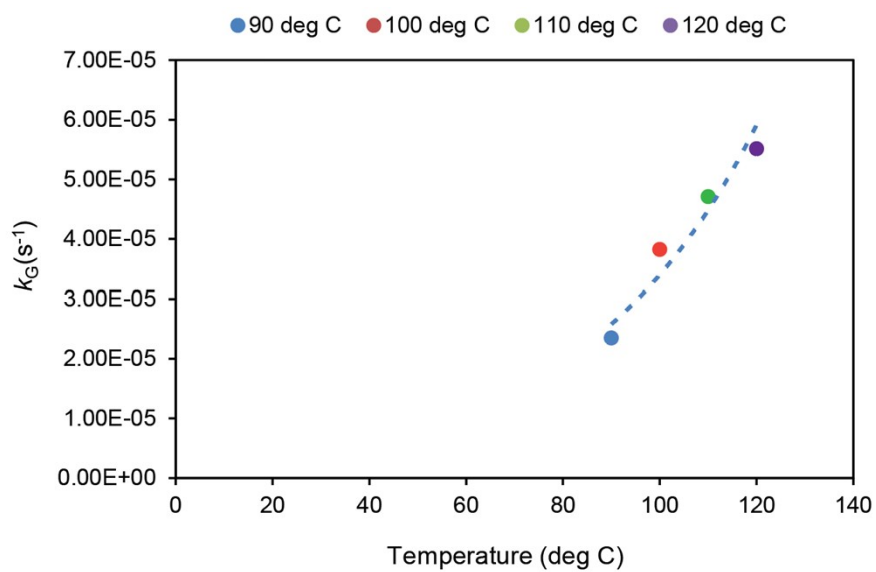

**Figure S11.** Correlation plot of rate constant ( $k_G$ ) vs. temperature (90-120  $^{\circ}C$ ).

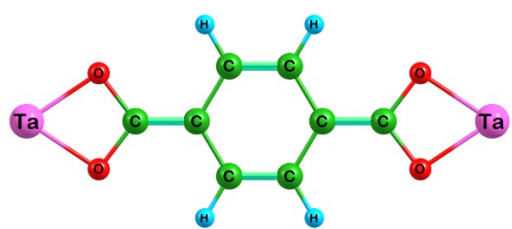

**Ta MOF**

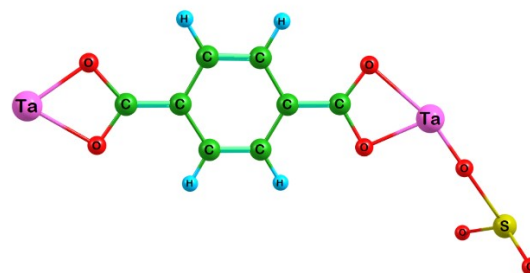

**S-Ta MOF**

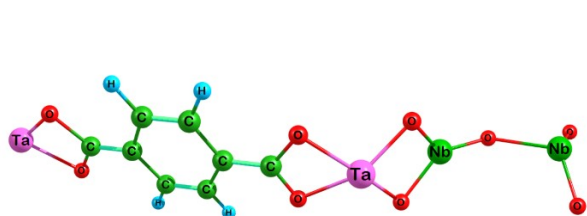

**Nb@Ta MOF**

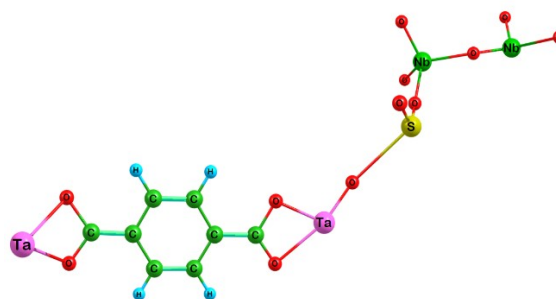

**Nb@S-Ta MOF**

**Figure S12.** DFT optimized structures of various MOFs for calculating the binding energy using VASP software.

**Table S1.** Determined *x*, *y* and *z* coordinates of MOF catalysts during DFT modeling.

|                 | <i>x</i>       | <i>y</i>       | <i>z</i>        |
|-----------------|----------------|----------------|-----------------|
| <b>Ta MOF</b>   |                |                |                 |
| Ta              | 7.049214009000 | 7.424328469000 | 15.287049043043 |
| Ta              | 7.049214009000 | 7.424328469000 | 4.781758900957  |
| O               | 6.284396785138 | 8.189145692862 | 13.663842301073 |
| O               | 7.814031232862 | 6.659511245138 | 6.404965642927  |
| O               | 6.284396785138 | 8.189145692862 | 6.404965642927  |
| O               | 7.814031232862 | 6.659511245138 | 13.663842301073 |
| C               | 7.049214009000 | 7.424328469000 | 12.832149489974 |
| C               | 7.049214009000 | 7.424328469000 | 11.454475874169 |
| C               | 6.173851678727 | 8.299690799273 | 10.716093901959 |
| C               | 7.049214009000 | 7.424328469000 | 7.236658454026  |
| C               | 7.049214009000 | 7.424328469000 | 8.614332069831  |
| C               | 7.924576339273 | 6.548966138727 | 9.352714042041  |
| C               | 6.173851678727 | 8.299690799273 | 9.352714042041  |
| C               | 7.924576339273 | 6.548966138727 | 10.716093901959 |
| H               | 5.509650195766 | 8.963892282234 | 11.269110932965 |
| H               | 8.588777822234 | 5.884764655766 | 8.799697011035  |
| H               | 5.509650195766 | 8.963892282234 | 8.799697011035  |
| H               | 8.588777822234 | 5.884764655766 | 11.269110932965 |
| <b>S-Ta MOF</b> |                |                |                 |
| Ta              | 6.628819171467 | 6.848656808548 | 15.272277386709 |
| Ta              | 7.094900570271 | 7.438126860604 | 4.932316680963  |
| S               | 7.177054808687 | 7.276376778141 | 19.596095329386 |
| O               | 6.276941196646 | 8.176109582526 | 13.800506289545 |
| O               | 7.840596986235 | 6.674531186639 | 6.558797658315  |
| O               | 6.313983174104 | 8.208725949900 | 6.539720057537  |
| O               | 7.874992081301 | 6.621370616654 | 13.738661661555 |
| O               | 6.314082693174 | 6.134529833308 | 19.839545040780 |
| O               | 8.590745206166 | 7.137537481679 | 19.884507910967 |
| O               | 7.259700168754 | 7.282175155644 | 16.843660789562 |
| C               | 7.069124168596 | 7.427885898804 | 12.988862563827 |
| C               | 7.044808692362 | 7.424571248233 | 11.595067741722 |
| C               | 6.179083089491 | 8.304791983305 | 10.863967831634 |
| C               | 7.064241202591 | 7.440030422013 | 7.379987589513  |
| C               | 7.051485816608 | 7.435879781538 | 8.760989124824  |
| C               | 7.924808490653 | 6.559494541955 | 9.494663015485  |
| C               | 6.177868317100 | 8.309940878818 | 9.497371159875  |
| C               | 7.922778108752 | 6.559053455135 | 10.859787094431 |
| H               | 5.518236119616 | 8.969801693190 | 11.419405658464 |
| H               | 8.588141210101 | 5.893476127857 | 8.943840359959  |
| H               | 5.514662173335 | 8.977779638742 | 8.948227992206  |
| H               | 8.585575163990 | 5.893829779768 | 11.412631145741 |

**Nb@Ta MOF**

|    |                 |                |                 |
|----|-----------------|----------------|-----------------|
| Ta | 7.209568228330  | 7.234308522021 | 15.208143627325 |
| Ta | 7.092804021219  | 7.483695896680 | 4.702133737297  |
| Nb | 8.613728628828  | 8.118366142426 | 17.516192427999 |
| Nb | 9.204631596072  | 8.501357296437 | 21.084415123721 |
| O  | 6.341765075853  | 8.076399419381 | 13.552183376000 |
| O  | 7.836231555182  | 6.684366899222 | 6.301799421655  |
| O  | 6.347388530182  | 8.246548059822 | 6.320243621768  |
| O  | 7.785166037764  | 6.397548452018 | 13.460899502413 |
| O  | 7.174685353689  | 8.734262508791 | 16.446139067797 |
| O  | 8.516195187527  | 6.531018070322 | 16.461858260103 |
| O  | 9.393884556290  | 8.725778500236 | 19.120163390883 |
| O  | 10.459168755893 | 9.247974624518 | 22.026862107639 |
| O  | 9.079549269892  | 6.831267142686 | 21.553063977154 |
| C  | 7.033138547566  | 7.260089863777 | 12.744949145498 |
| C  | 7.030862160328  | 7.312424918075 | 11.352057492585 |
| C  | 6.200509478421  | 8.242671707433 | 10.646699915516 |
| C  | 7.081356218807  | 7.446601924233 | 7.148140049528  |
| C  | 7.059224608183  | 7.406168317768 | 8.526871005008  |
| C  | 7.896725617255  | 6.478209923086 | 9.238431376835  |
| C  | 6.208648487628  | 8.288941525786 | 9.280978336510  |
| C  | 7.876766996760  | 6.432735665621 | 10.602365460496 |
| H  | 5.565602117129  | 8.916207441452 | 11.221932804825 |
| H  | 8.548855176728  | 5.816258967823 | 8.669618235897  |
| H  | 5.579246466771  | 8.999586542871 | 8.746148578459  |
| H  | 8.511544521705  | 5.731409565514 | 11.142776663091 |

**Nb@S-Ta MOF**

|    |                 |                 |                 |
|----|-----------------|-----------------|-----------------|
| Ta | 7.260490796554  | 10.800402687196 | 13.932471106522 |
| Ta | 7.752426280232  | 12.065814002349 | 4.113824546406  |
| Nb | 9.500589036644  | 4.939463950851  | 17.935257022370 |
| Nb | 10.042014091117 | 4.390089308330  | 21.636218217847 |
| S  | 9.797865783931  | 8.352487773964  | 16.730028062196 |
| O  | 6.332650486167  | 11.983252194198 | 12.217701356652 |
| O  | 7.572443260748  | 10.344832138576 | 4.970299665952  |
| O  | 6.038836838687  | 12.016153245292 | 5.004065017795  |
| O  | 7.822580898662  | 10.326605007345 | 12.119647726523 |
| O  | 9.422185512948  | 7.001581000165  | 17.260636984534 |
| O  | 10.980052563441 | 8.384792558770  | 15.897412817585 |
| O  | 8.042749278008  | 9.595710532023  | 14.911133205051 |
| O  | 7.847145513636  | 4.368759214064  | 17.890958973889 |
| O  | 10.458958409442 | 3.893419623448  | 16.919167151673 |
| O  | 10.112870875234 | 4.934217042547  | 19.806143264883 |
| O  | 11.325141555109 | 5.103468904706  | 22.574453907355 |
| O  | 10.114033431650 | 2.665064228356  | 21.859564201755 |
| C  | 7.039756468925  | 11.237646251889 | 11.463041615947 |
| C  | 7.053214715855  | 11.269349852960 | 10.024369851559 |
| C  | 6.192625221521  | 12.163227157540 | 9.341810048329  |
| C  | 6.900744924587  | 11.251948118399 | 5.801081229765  |
| C  | 6.989607715169  | 11.300715870025 | 7.223595496715  |

|   |                |                 |                |
|---|----------------|-----------------|----------------|
| C | 7.865225912349 | 10.421018627037 | 7.905971147695 |
| C | 6.156722244628 | 12.179128498048 | 7.961348495538 |
| C | 7.894582900765 | 10.405097069027 | 9.286590447226 |
| H | 5.553056980075 | 12.826970362488 | 9.923204498052 |
| H | 8.499278179922 | 9.748163356263  | 7.329269874373 |
| H | 5.483846653415 | 12.850126127503 | 7.428506048923 |
| H | 8.558137059579 | 9.723253303640  | 9.817142920888 |
